## Correction

## Correction: Ecosystem Service Valuations of Mangrove Ecosystems to Inform Decision Making and Future Valuation Exercises

## The *PLOS ONE* Staff

The attribution for the original source of Figure 1 is missing. Please see the corrected Figure 1 caption here.

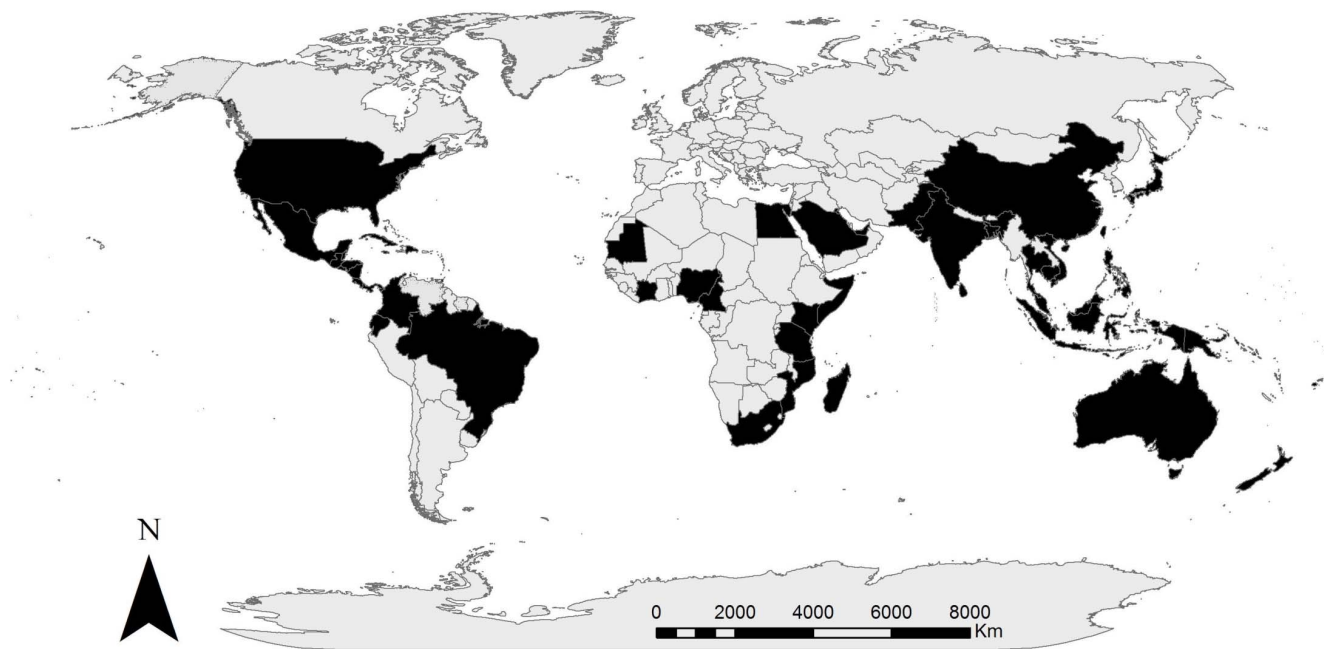

**Figure 1. Map representing countries (coloured black) where the experts have conducted primary research on mangrove ecosystems.** Adapted from DOI: 10.1002/ece3.1085.  
doi:10.1371/journal.pone.0107706.g001

## Reference

1. Mukherjee N, Sutherland WJ, Dicks L, Hugé J, Koedam N, et al. (2014) Ecosystem Service Valuations of Mangrove Ecosystems to Inform Decision Making and Future Valuation Exercises. *PLoS ONE* 9(9): e107706. doi:10.1371/journal.pone.0107706

**Citation:** The PLOS ONE Staff (2014) Correction: Ecosystem Service Valuations of Mangrove Ecosystems to Inform Decision Making and Future Valuation Exercises. PLoS ONE 9(10): e111386. doi:10.1371/journal.pone.0111386

Published October 13, 2014

**Copyright:** © 2014 The PLOS ONE Staff. This is an open-access article distributed under the terms of the Creative Commons Attribution License, which permits unrestricted use, distribution, and reproduction in any medium, provided the original author and source are credited.
